# Supplementary material for: Structure and function of the ROR2 cysteine-rich domain in vertebrate noncanonical WNT5A signaling
Source: eLife. 2024 May 23;13:e71980. doi: 10.7554/eLife.71980 (PMC11219042; doi:10.7554/eLife.71980)
Supplement: Figure 3—source data 1. [file elife-71980-fig3-data1.xlsx]

## Sheet: Sheet1
Figure 3C Source File
ROR cKO
WNT5A conc. (ng/ml)	Average	Stdev	Std Error
0	0	0	0
25	7.67074	0.870061	0.615226
50	19.193	1.32464	0.936664
100	33.3962	2.02851	1.43437
200	53.179	2.02362	1.43092
400	62.0399	1.78411	1.26156
ROR KO
WNT5A conc. (ng/ml)	Average	Stdev	Std Error
0	0	0	0
25	3.49736	1.56671	1.10783
50	6.79548	2.51966	1.78167
100	16.1416	1.34418	0.950479
200	30.2833	3.58747	2.53672
400	42.9327	1.17548	0.831193
WT ROR2 rescue
WNT5A conc. (ng/ml)	Average	Stdev	Std Error
0	0	0	0
25	17.1269	3.88706	2.74856
50	40.5804	0.657175	0.464693
100	60.6487	0.405209	0.286526
200	69.11	0.359531	0.254227
400	72.9161	1.58989	1.12422
