# Supplementary material for: Structure and function of the ROR2 cysteine-rich domain in vertebrate noncanonical WNT5A signaling
Source: eLife. 2024 May 23;13:e71980. doi: 10.7554/eLife.71980 (PMC11219042; doi:10.7554/eLife.71980)
Supplement: Figure 3—source data 2. [file elife-71980-fig3-data2.xlsx]

## Sheet: Sheet1
Figure 3F Source File
	Average	Stdev	Std Error	p value
ROR KO	23.54	0.3659	0.2113	reference
WT ROR2	70.23	0.7722	0.4458	<0.0001
ΔIg	63.92	1.574	0.9085	0.0003
ΔCRD	24.49	1.751	1.011	0.4469
ΔKr	65.04	1.411	0.8147	0.0002
ΔCRD-Kr	25.35	2.111	1.219	0.2739
ΔICD	52.14	2.001	1.155	0.0012
