# Supplementary material for: Structure and function of the ROR2 cysteine-rich domain in vertebrate noncanonical WNT5A signaling
Source: eLife. 2024 May 23;13:e71980. doi: 10.7554/eLife.71980 (PMC11219042; doi:10.7554/eLife.71980)
Supplement: Figure 3—source data 3. [file elife-71980-fig3-data3.xlsx]

## Sheet: Sheet1
Figure 3I Source File
	Average	Stdev	Std Error	p value
ROR KO	9.782	1.609	0.9291	reference
WT ROR2	50.02	1.675	0.9669	<0.0001
Mini-ROR2	37.46	2.679	1.547	0.0004
