# Supplementary material for: Structure and function of the ROR2 cysteine-rich domain in vertebrate noncanonical WNT5A signaling
Source: eLife. 2024 May 23;13:e71980. doi: 10.7554/eLife.71980 (PMC11219042; doi:10.7554/eLife.71980)
Supplement: Figure 4—source data 1. [file elife-71980-fig4-data1.xlsx]

## Sheet: Sheet1
Figure 4B Source File
ROR cKO
	Average	Stdev	Std Error	p value
PBS	-1e-08	1.79719	1.03761	reference
WNT5A	52.8446	1.60892	0.928913	3e-06
Ctrl IgG	-2.24482	0.627684	0.362394	0.110632
F2.A IgG	51.3013	1.88801	1.09004	5e-06
FZ1 IgG	61.2923	1.10537	0.638185	7e-06
ROR KO
	Average	Stdev	Std Error	p value
PBS	1.33333e-08	1.42976	0.825475	reference
WNT5A	30.9153	2.69829	1.55786	6.2e-05
Ctrl IgG	-2.88066	1.83114	1.05721	0.09824
F2.A IgG	41.3802	2.58185	1.49063	0.000116
FZ1 IgG	55.9339	1.43095	0.826157	1e-06
WT ROR2 rescue
	Average	Stdev	Std Error	p value
PBS	-6.66667e-09	3.17774	1.83467	reference
WNT5A	53.7683	0.217098	0.125341	8e-06
Ctrl IgG	0.769026	1.02652	0.592662	0.710367
F2.A IgG	40.4156	1.49798	0.864858	0.000381
FZ1 IgG	53.0084	0.985018	0.5687	0.000485
