# Supplementary material for: Structure and function of the ROR2 cysteine-rich domain in vertebrate noncanonical WNT5A signaling
Source: eLife. 2024 May 23;13:e71980. doi: 10.7554/eLife.71980 (PMC11219042; doi:10.7554/eLife.71980)
Supplement: Figure 4—source data 2. [file elife-71980-fig4-data2.xlsx]

## Sheet: Sheet1
Figure 4C Source File
ROR KO
F2.A IgG conc (nM)	Average	Stdev	Std Error
0	2e-08	0.714492	0.505222
0.017	2.3966	1.00882	0.713344
0.051	3.97717	0.288727	0.204161
0.15	16.6236	0.112905	0.0798361
0.46	32.886	0.228827	0.161805
1.37	48.0171	1.18809	0.840107
4.12	52.4745	0.539963	0.381811
12.35	52.4928	0.449466	0.317821
37	53.2549	1.72202	1.21765
111.1	51.5841	0.803695	0.568298
333.3	49.9304	0.0853253	0.0603341
1000	47.9345	0.536084	0.379069
