# Supplementary material for: Structure and function of the ROR2 cysteine-rich domain in vertebrate noncanonical WNT5A signaling
Source: eLife. 2024 May 23;13:e71980. doi: 10.7554/eLife.71980 (PMC11219042; doi:10.7554/eLife.71980)
Supplement: Figure 4—source data 3. [file elife-71980-fig4-data3.xlsx]

## Sheet: Sheet1
Figure 4D Source File
ROR KO
FZ1 IgG conc (nM)	Average	Stdev	Std Error
0	2e-08	0.492129	0.347988
0.017	1.6537	1.75175	1.23868
0.051	1.92338	0.155999	0.110308
0.15	3.52132	1.16439	0.823347
0.46	5.46389	1.50095	1.06133
1.37	11.0963	2.07323	1.466
4.12	24.464	1.02907	0.727666
12.35	39.6361	0.498593	0.352558
37	54.6849	1.24756	0.882158
111.1	61.0611	0.0275799	0.0195019
333.3	60.4602	0.759309	0.536913
1000	49.9646	1.45742	1.03056
