# Supplementary material for: Structure and function of the ROR2 cysteine-rich domain in vertebrate noncanonical WNT5A signaling
Source: eLife. 2024 May 23;13:e71980. doi: 10.7554/eLife.71980 (PMC11219042; doi:10.7554/eLife.71980)
Supplement: Figure 4—source data 4. [file elife-71980-fig4-data4.xlsx]

## Sheet: Sheet1
Figure 4E Source File
ROR cKO
	Average	Stdev	Std Error	p value
PBS	8.14533e-05	3.61404	2.08657	reference
WNT5A	56.8671	1.17236	0.676865	1.3e-05
Ctrl Fab	-8.14467e-05	1.21764	0.703005	0.999947
F2.A Fab	-3.33333e-09	4.21716	2.43478	0.999981
ROR KO
	Average	Stdev	Std Error	p value
PBS	-9.91967e-05	3.76425	2.17329	reference
WNT5A	29.2847	1.17597	0.678944	0.000211
Ctrl Fab	-9.91833e-05	1.90335	1.0989	>0.999999
F2.A Fab	9.91867e-05	4.268	2.46413	0.999955
WT ROR2 rescue
	Average	Stdev	Std Error	p value
PBS	0.00049277	2.40639	1.38933	reference
WNT5A	62.358	0.825755	0.47675	2e-06
Ctrl Fab	6.14767e-05	8.97815	5.18354	0.999942
F2.A Fab	-6.158e-05	1.74173	1.00559	0.999759
