# Supplementary material for: Structure and function of the ROR2 cysteine-rich domain in vertebrate noncanonical WNT5A signaling
Source: eLife. 2024 May 23;13:e71980. doi: 10.7554/eLife.71980 (PMC11219042; doi:10.7554/eLife.71980)
Supplement: Figure 4—source data 5. [file elife-71980-fig4-data5.xlsx]

## Sheet: Sheet1
Figure 4F Source File
ROR cKO
	Average	Stdev	Std Error	p value
PBS	56.8671	1.17236	0.676865	reference
Ctrl Fab	58.0814	2.22986	1.28741	0.464547
F2.A Fab	-0.753459	1.17288	0.677163	<0.000001
ROR KO
	Average	Stdev	Std Error	p value
PBS	29.2847	1.17597	0.678944	reference
Ctrl Fab	30.3995	0.283684	0.163785	0.238646
F2.A Fab	-5.68092	0.940784	0.543162	2e-06
WT ROR2 rescue
	Average	Stdev	Std Error	p value
PBS	62.358	0.825755	0.47675	reference
Ctrl Fab	68.5965	0.180337	0.104117	0.004243
F2.A Fab	-4.19283	1.92007	1.10855	<0.000001
