# Supplementary material for: Structure and function of the ROR2 cysteine-rich domain in vertebrate noncanonical WNT5A signaling
Source: eLife. 2024 May 23;13:e71980. doi: 10.7554/eLife.71980 (PMC11219042; doi:10.7554/eLife.71980)
Supplement: Figure 5—source data 1. [file elife-71980-fig5-data1.xlsx]

## Sheet: Sheet1
Figure 5B Source File
	Average	Stdev	Std Error	p value
ROR KO	23.79	0.2659	0.1535	0.0007
WT ROR2	69.97	2.208	1.275	reference
C182Y	24.64	0.9023	0.521	0.0002
R184C	33.1	1.501	0.8664	<0.0001
R189W	59.94	0.5934	0.3426	0.0114
C223Y	23.49	1.045	0.6031	<0.0001
R272C	47.3	0.9935	0.5736	0.0008
G326A	26.49	1.141	0.659	<0.0001
R366W	23.39	1.158	0.6686	<0.0001
