# Supplementary material for: Structure and function of the ROR2 cysteine-rich domain in vertebrate noncanonical WNT5A signaling
Source: eLife journal article supplement (doi:10.7554/elife.71980), 2024-05-23
Supplement: supp [file elife-71980-supp-v1.zip]

Figure 3-figure supplement 2C  
Uncropped blots with labels

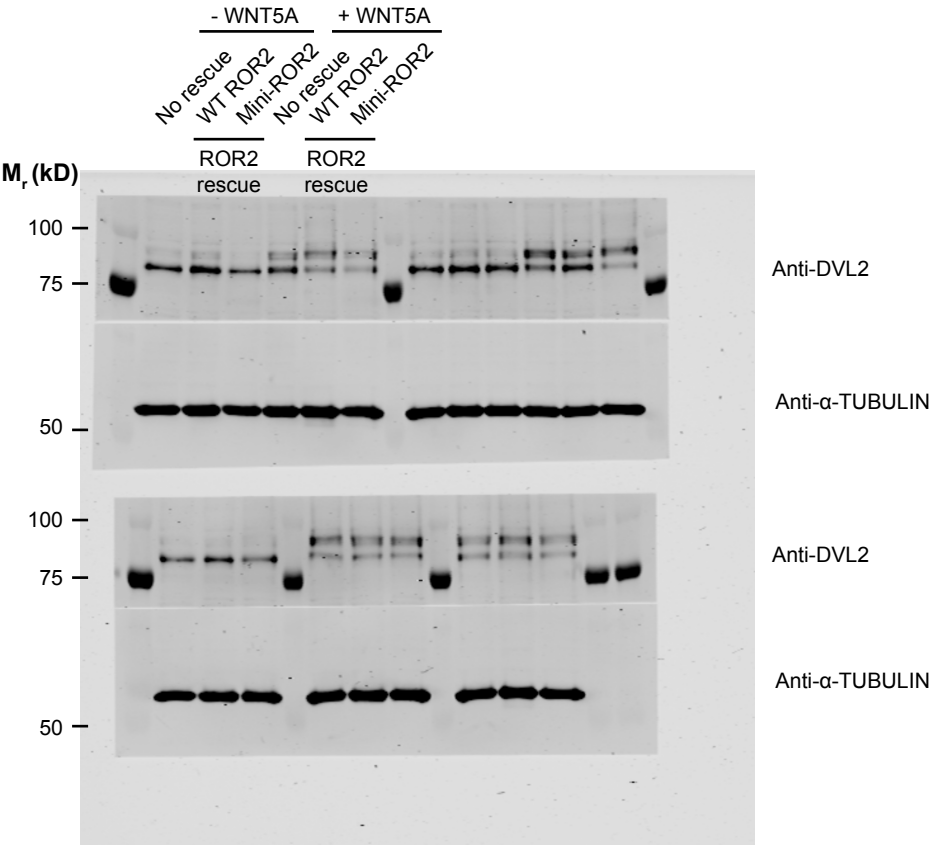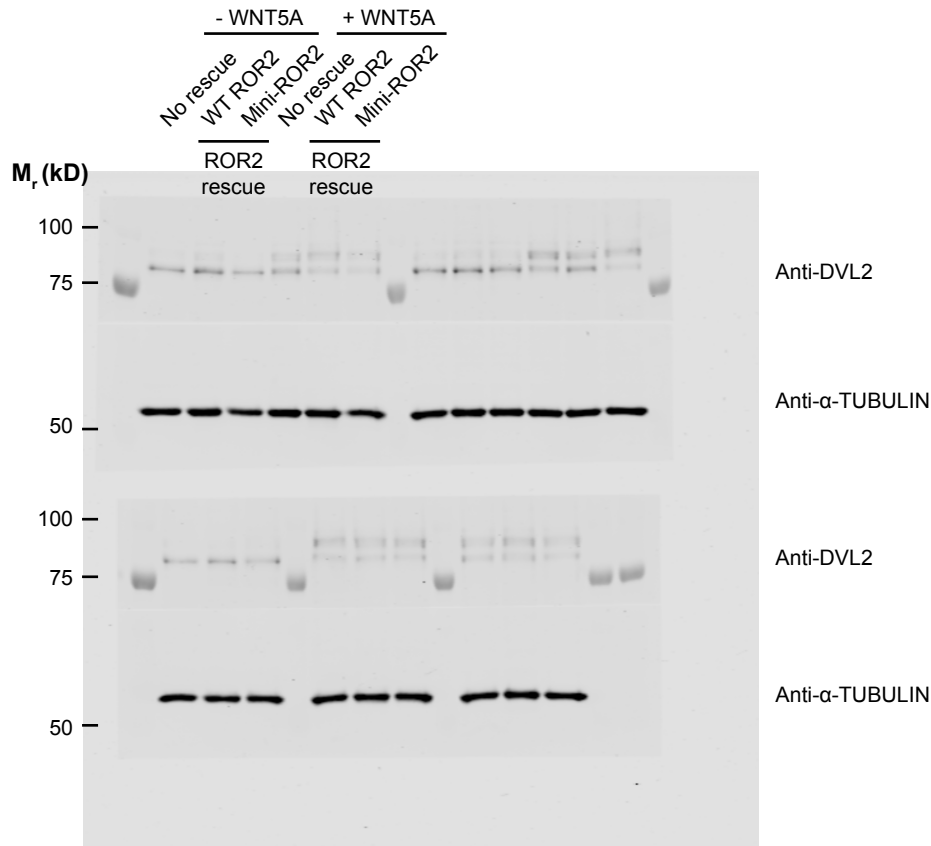

Top blot used for the DVL2 panel in the figure supplement  
Bottom blot used for TUBULIN panel in the figure supplement
