# Supplementary material for: Structure and function of the ROR2 cysteine-rich domain in vertebrate noncanonical WNT5A signaling
Source: eLife journal article supplement (doi:10.7554/elife.71980), 2024-05-23
Supplement: supp [file elife-71980-supp-v1.zip]

**Figure 4-figure supplement**  
**Uncropped blots with lables**

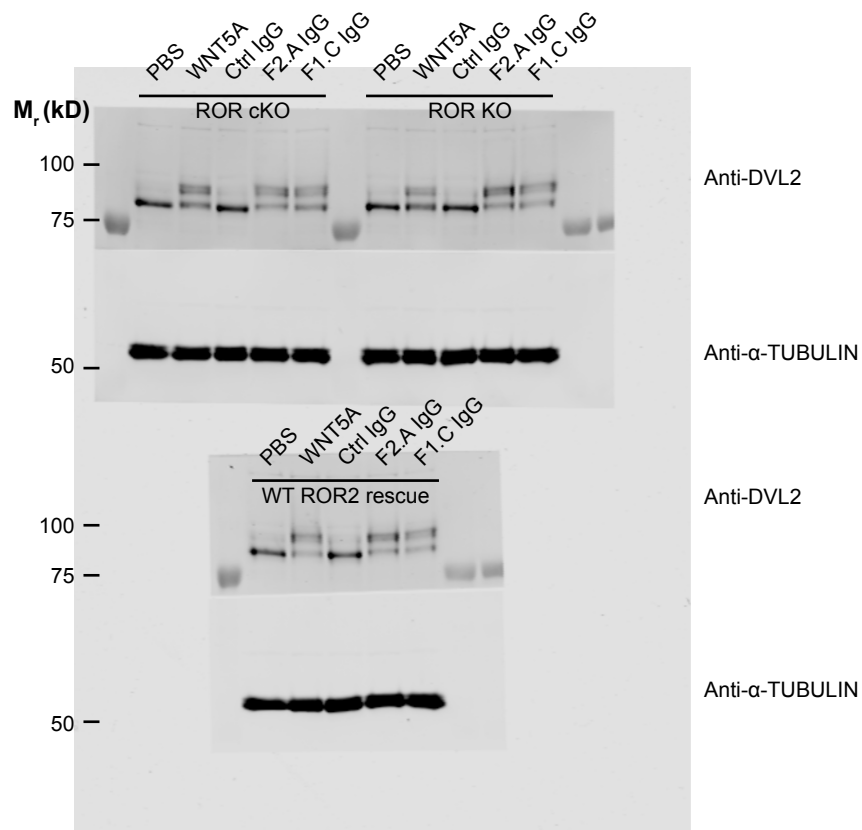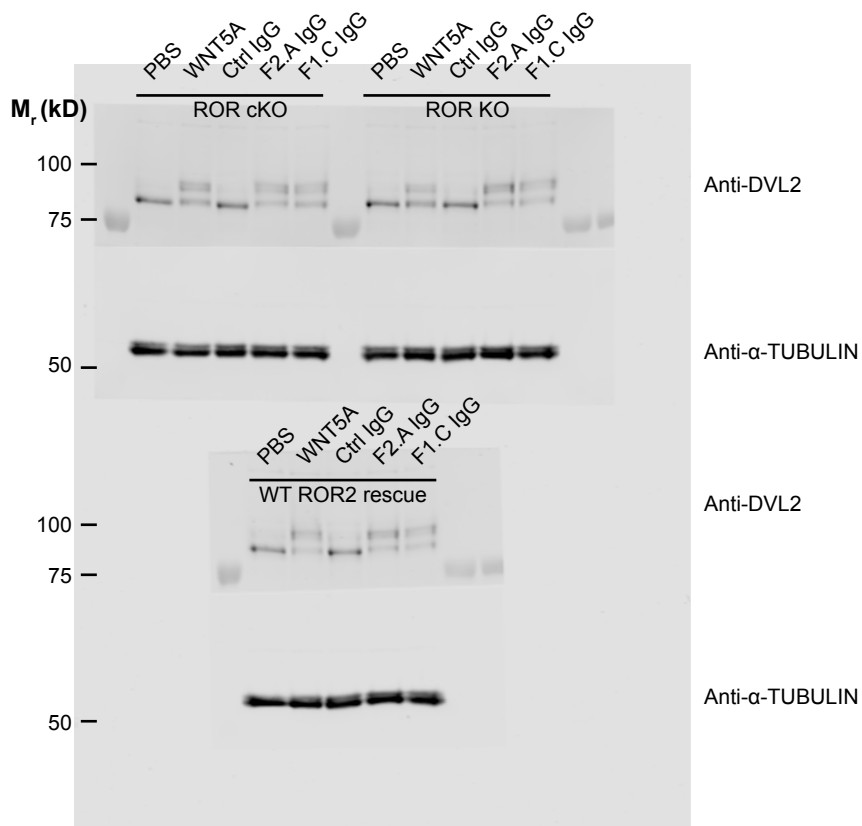

Top blots used for the DVL2 panels in the figure supplement  
 Bottom blots used for TUBULIN panels in the figure supplement
