# Supplementary material for: Structure and function of the ROR2 cysteine-rich domain in vertebrate noncanonical WNT5A signaling
Source: eLife journal article supplement (doi:10.7554/elife.71980), 2024-05-23
Supplement: supp [file elife-71980-supp-v1.zip]

**Figure 4A**  
**Uncropped blot with labels**

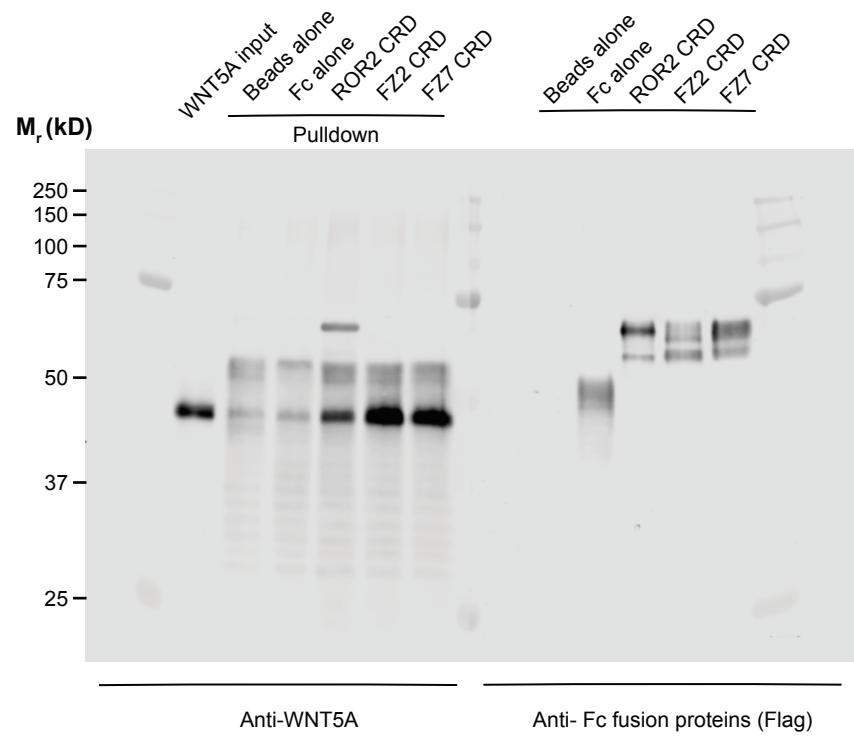

\*\*\*The upper band in the ROR2 CRD lane of the anti-WNT5A panel is from a cross-reactivity of the anti-WNT5A antibody toward the ROR2 CRD. In an independent experiment in which we blotted ROR2 CRD-Kr with the same anti-WNT5A antibody, we observed the same antibody cross-reactivity at the exact molecular weight of the ROR2 CRD-Kr protein.
