# Supplementary figures and images for: Structure and function of the ROR2 cysteine-rich domain in vertebrate noncanonical WNT5A signaling
Source: eLife journal article supplement (doi:10.7554/elife.71980), 2024-05-23

**Figure 5-figure supplement 1**

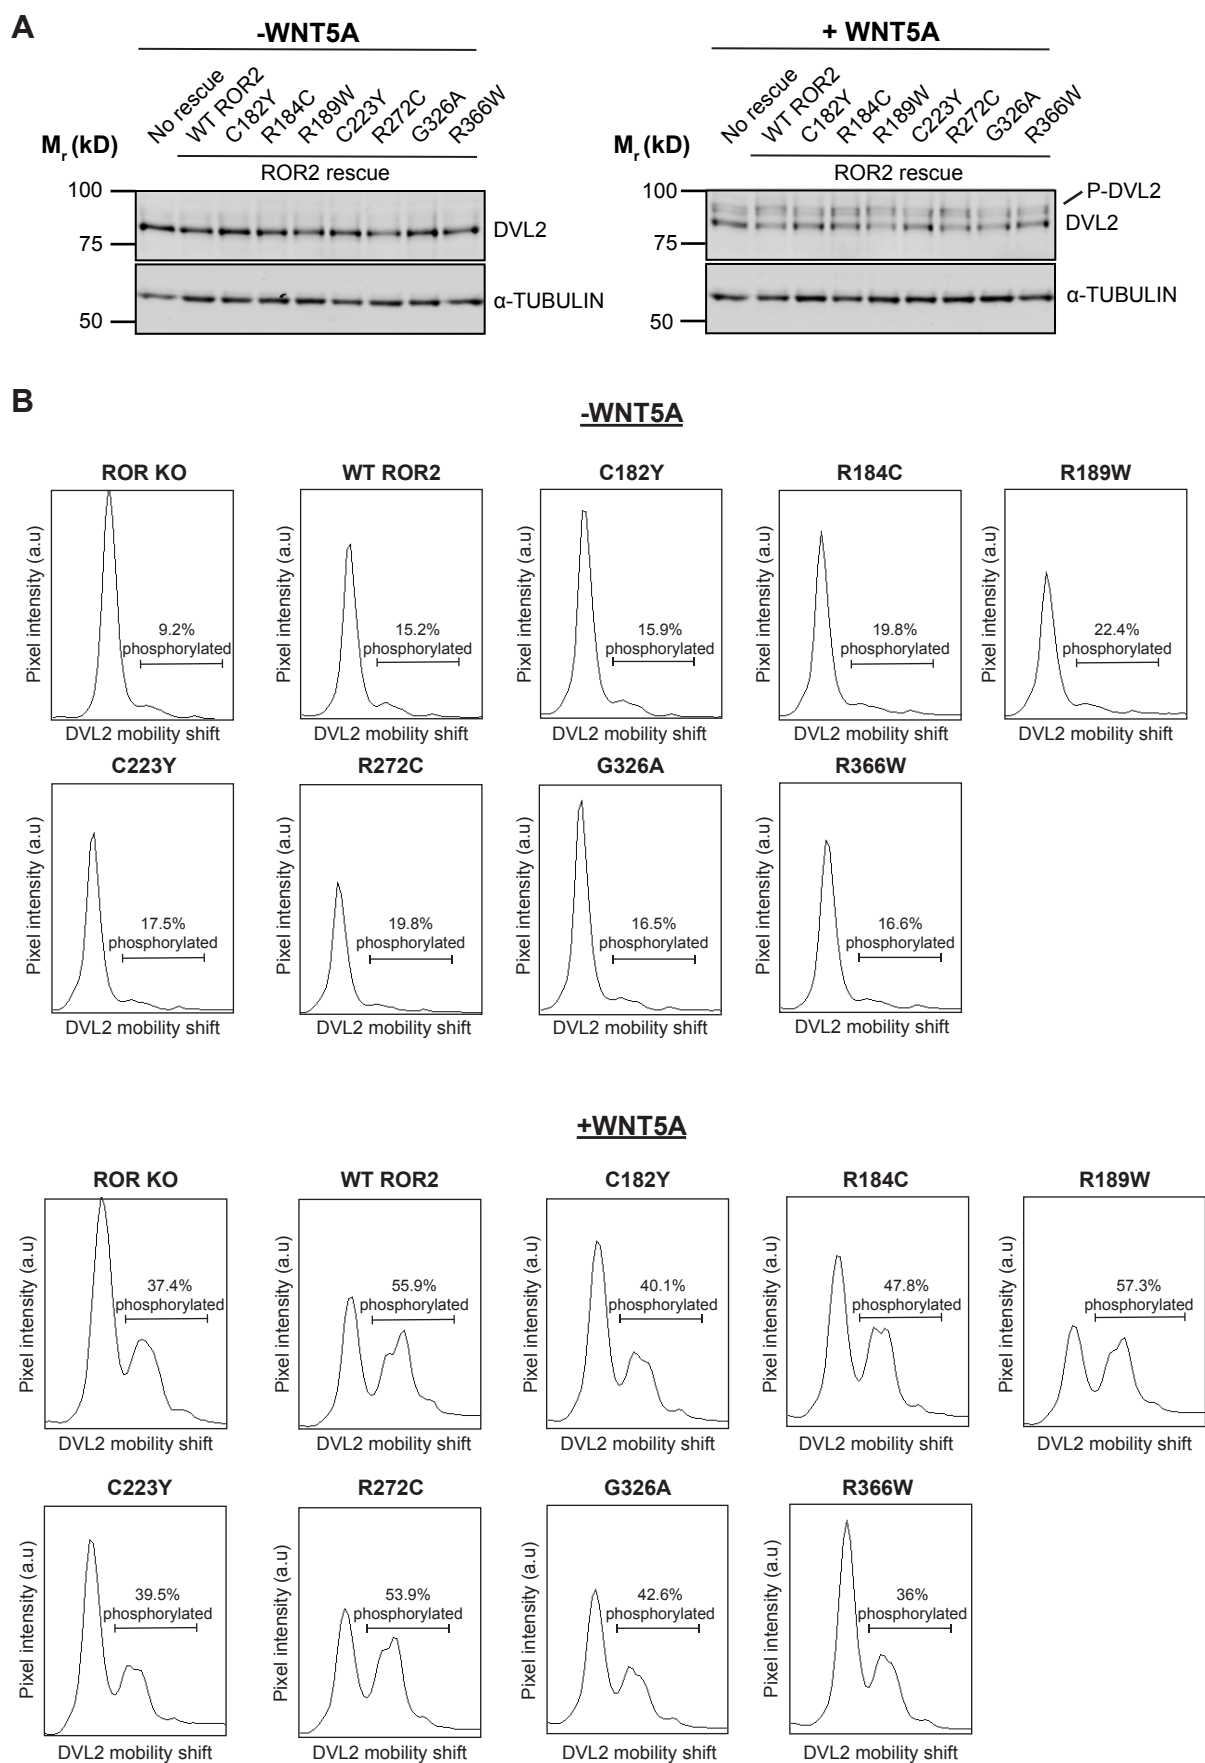

Supplement: supp [file elife-71980-supp-v1.zip]

Figure 5-figure supplement 2

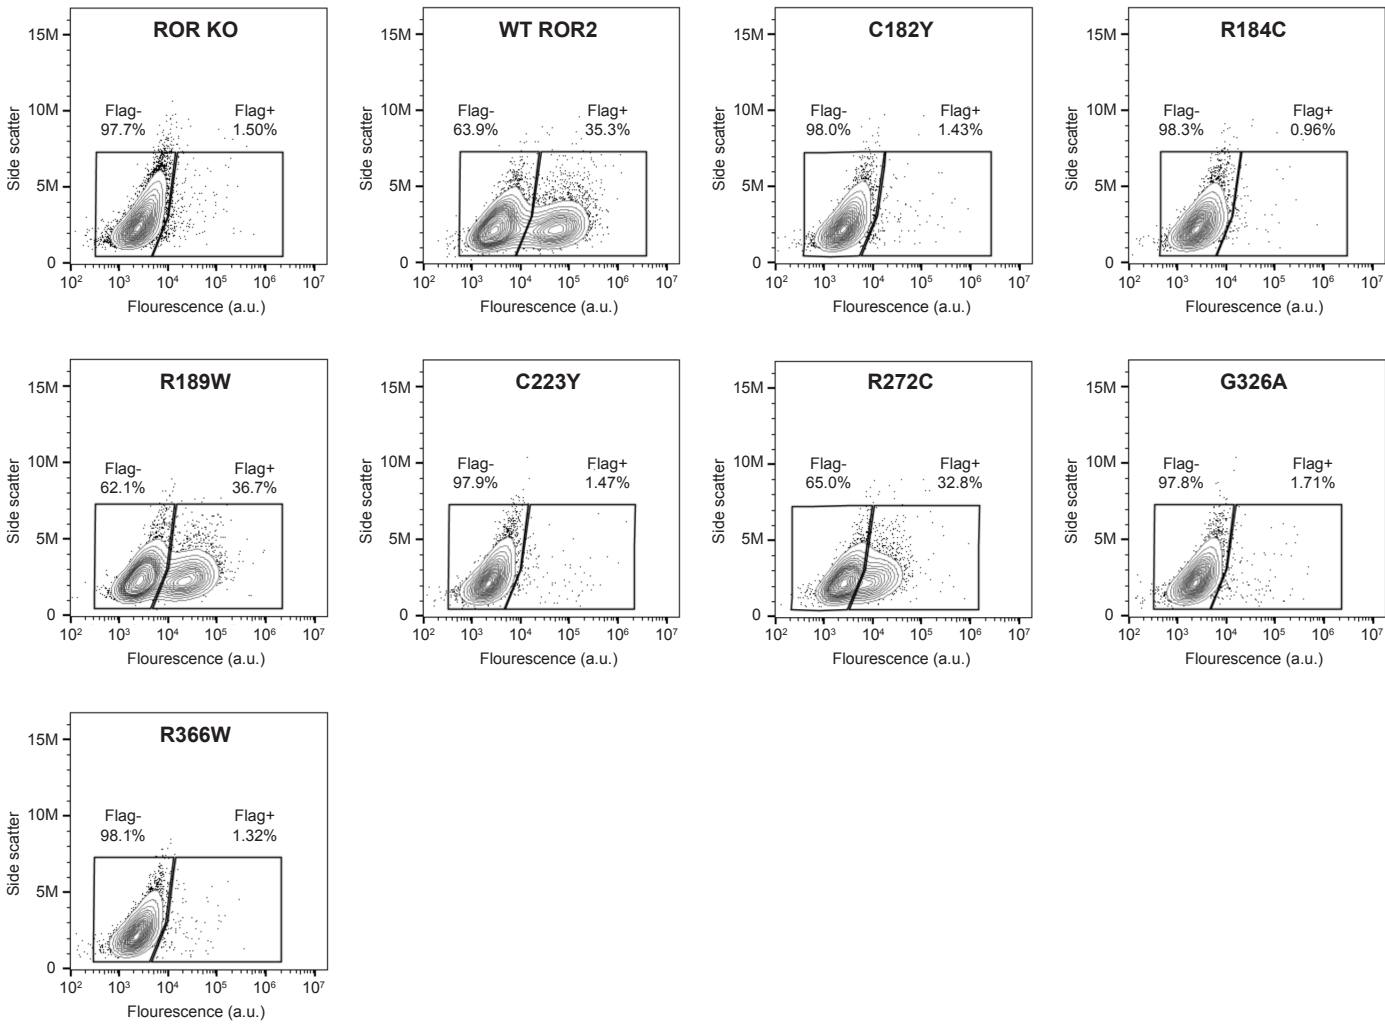

Supplement: supp [file elife-71980-supp-v1.zip]

**Figure 1-figure supplement 2**

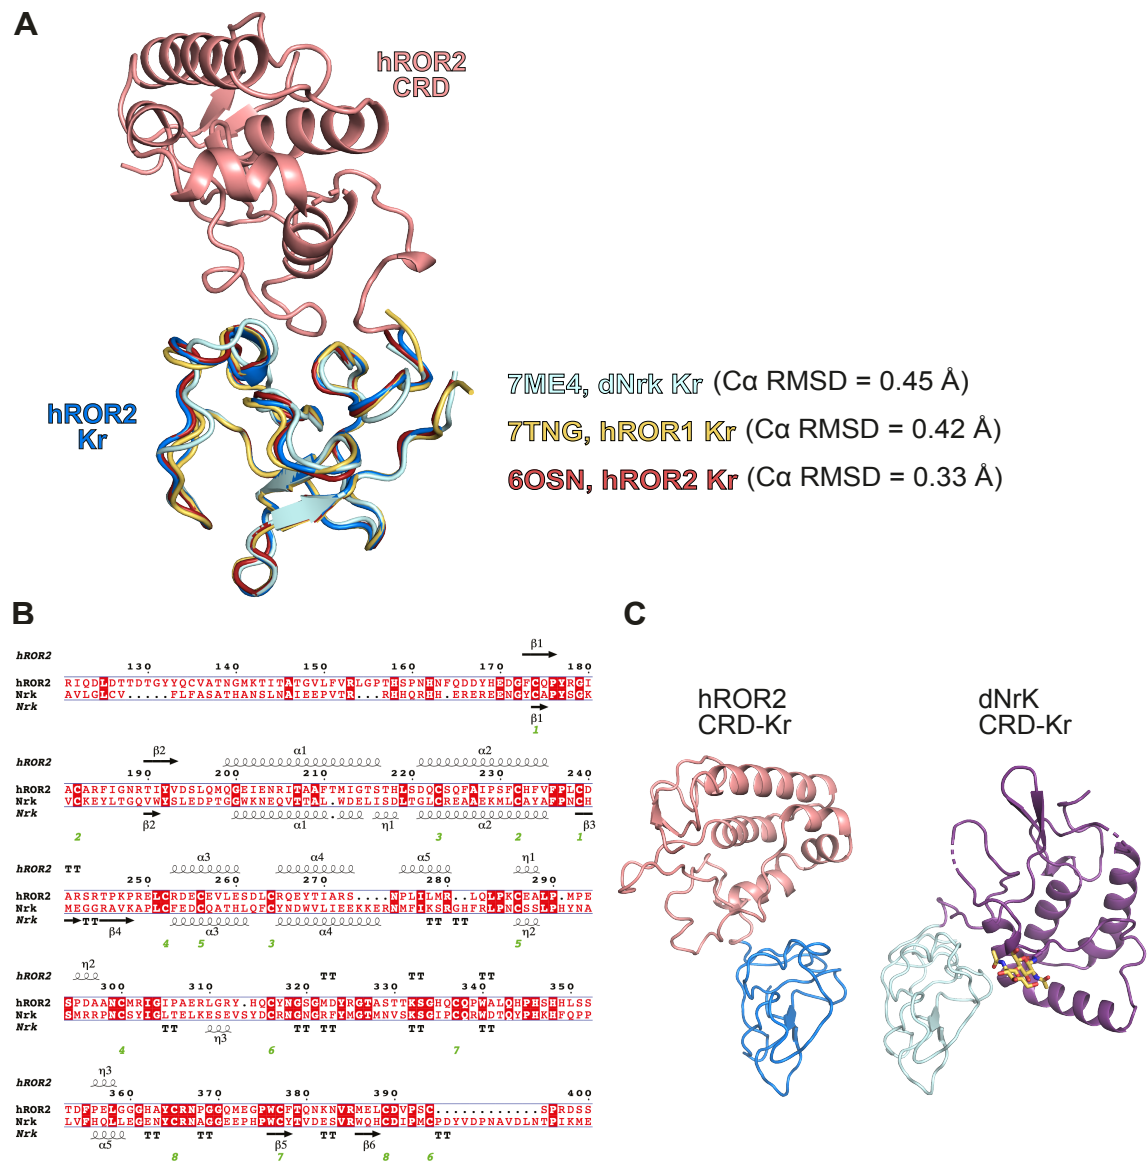

Supplement: supp [file elife-71980-supp-v1.zip]

Figure 1-figure supplement 1A  
Uncropped blot with labels

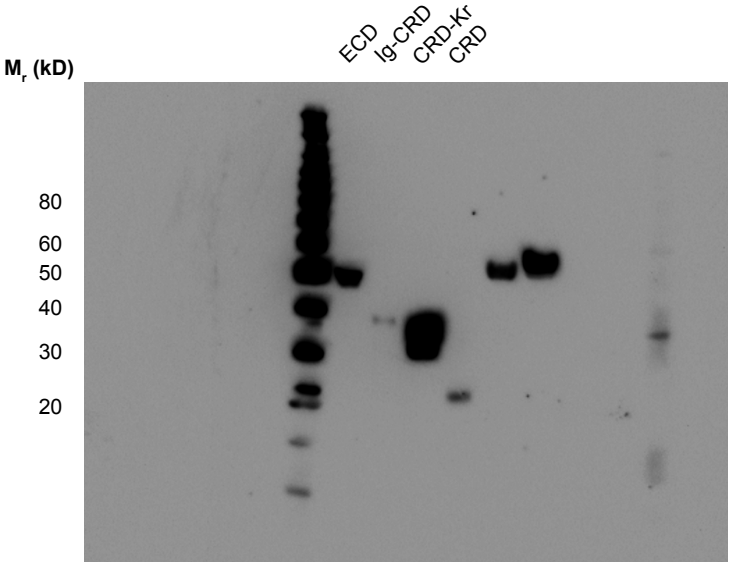

Supplement: supp [file elife-71980-supp-v1.zip]

**Figure 4-figure supplement**

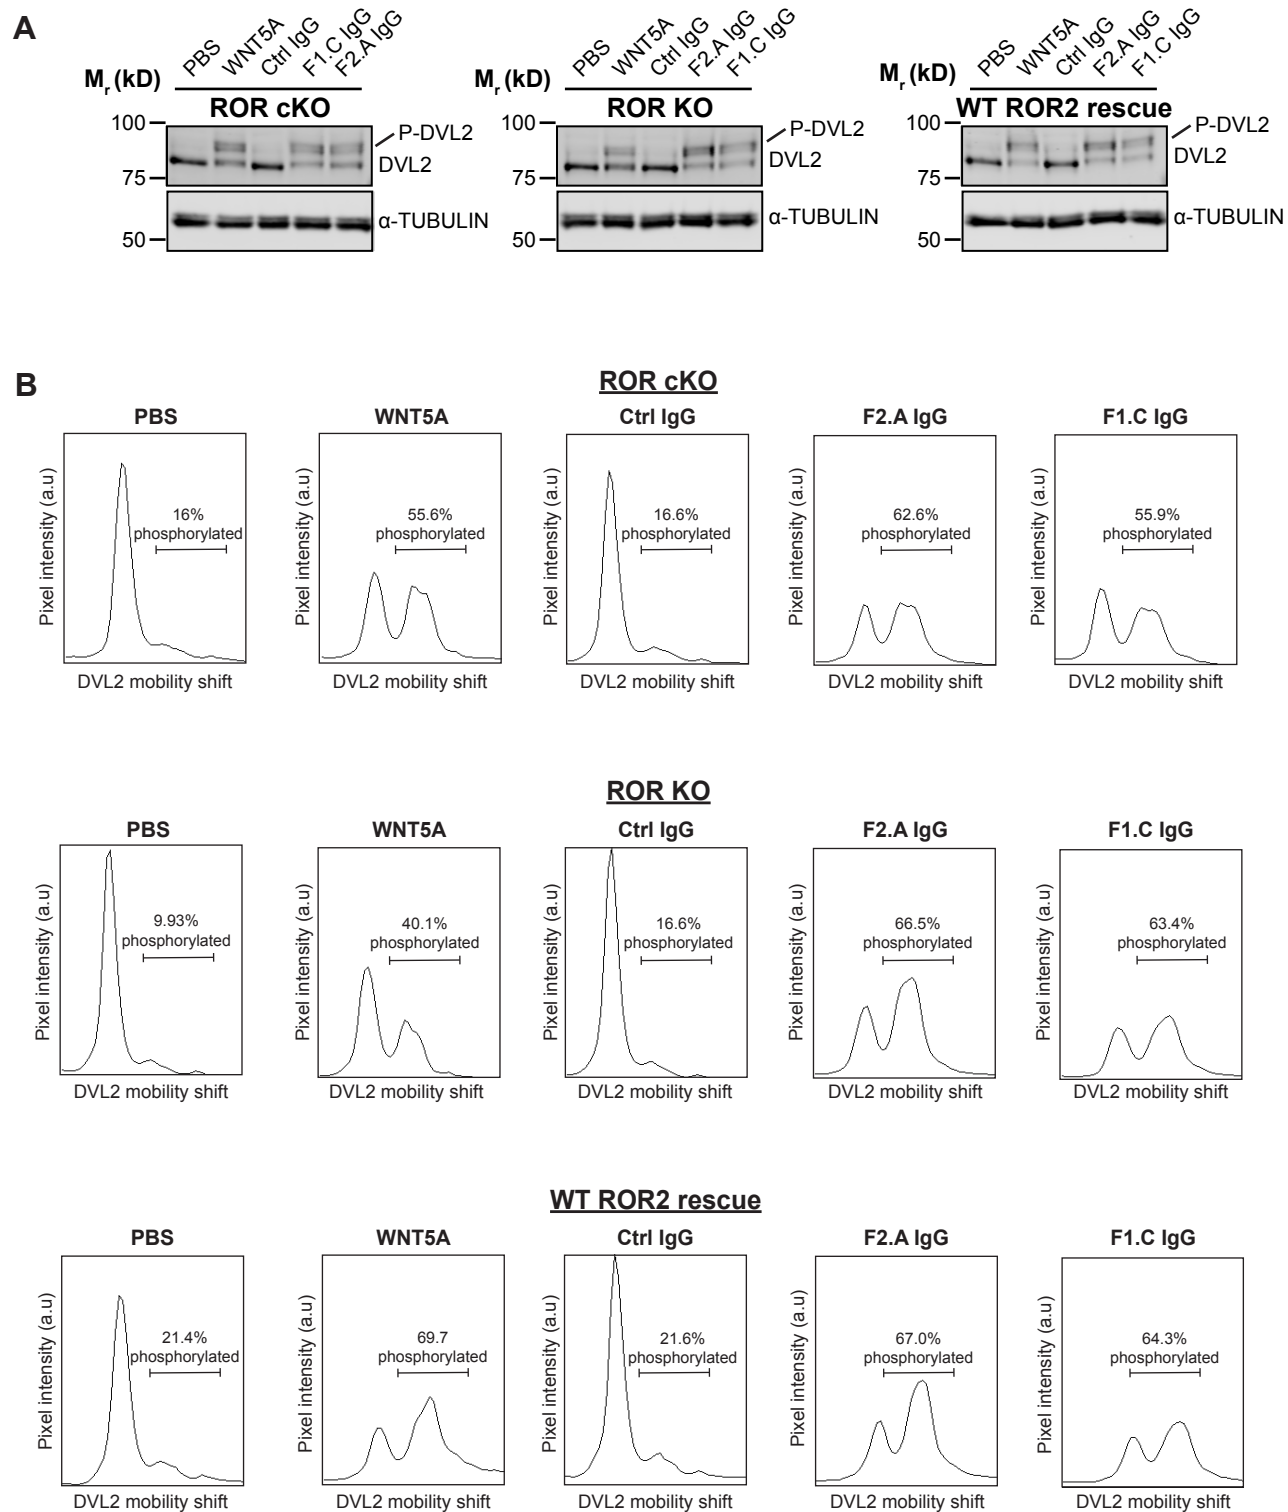

Supplement: supp [file elife-71980-supp-v1.zip]

**Figure 5A**  
**Uncropped blot with labels**

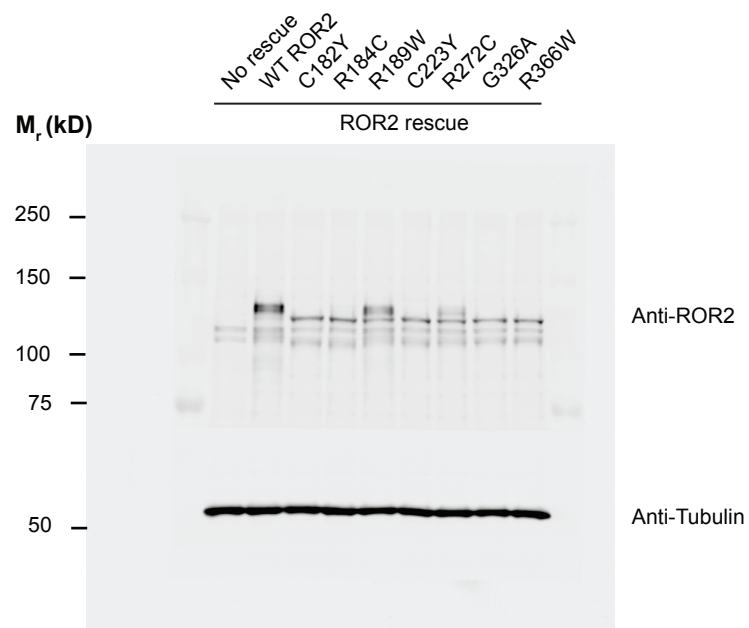

Supplement: supp [file elife-71980-supp-v1.zip]

Figure 1-figure supplement 1C  
Uncropped gel with labels

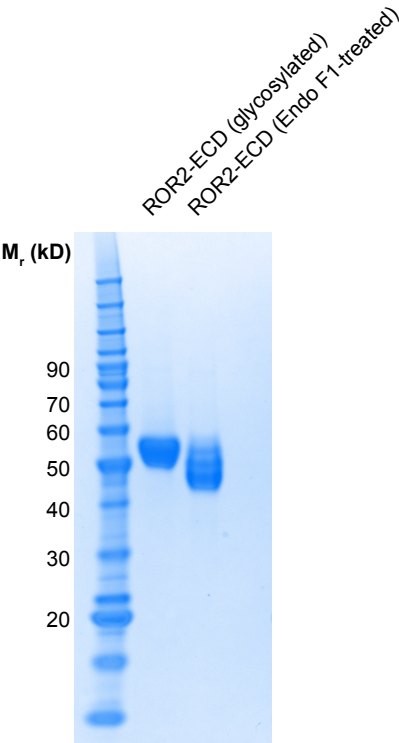

Supplement: supp [file elife-71980-supp-v1.zip]

Figure 1-figure supplement 1

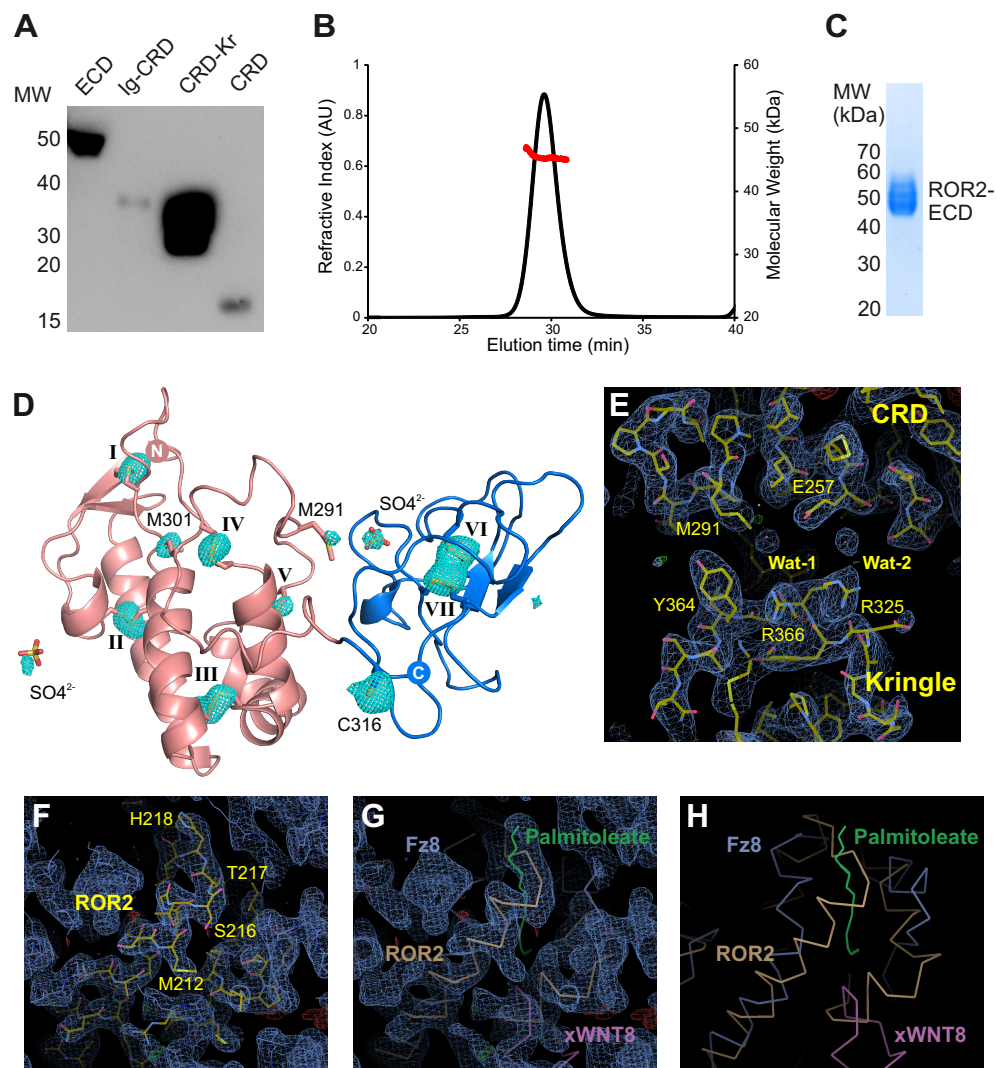

Supplement: supp [file elife-71980-supp-v1.zip]

Figure 2-figure supplement 2

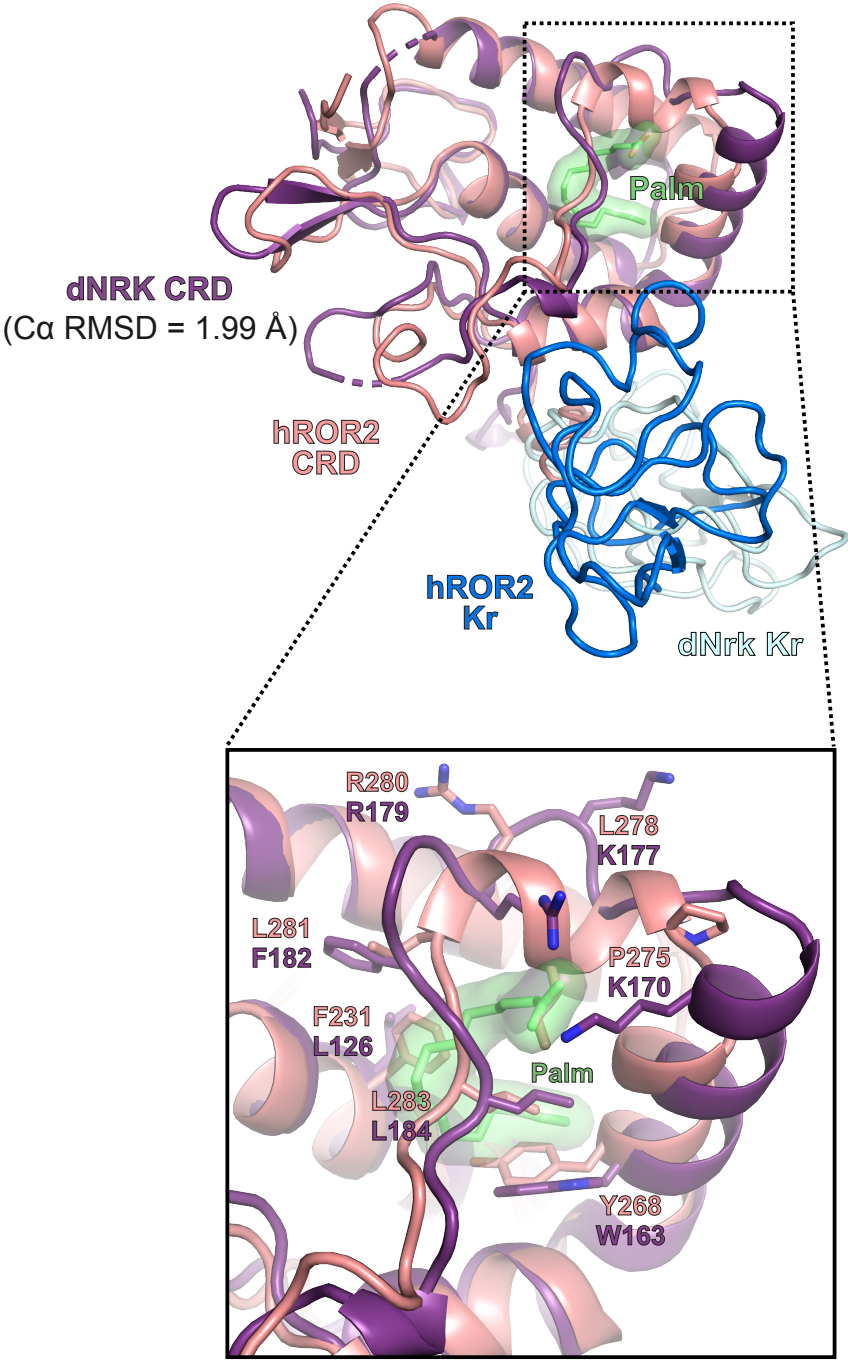

Supplement: supp [file elife-71980-supp-v1.zip]

**Figure 3H**  
**Uncropped blots with labels**

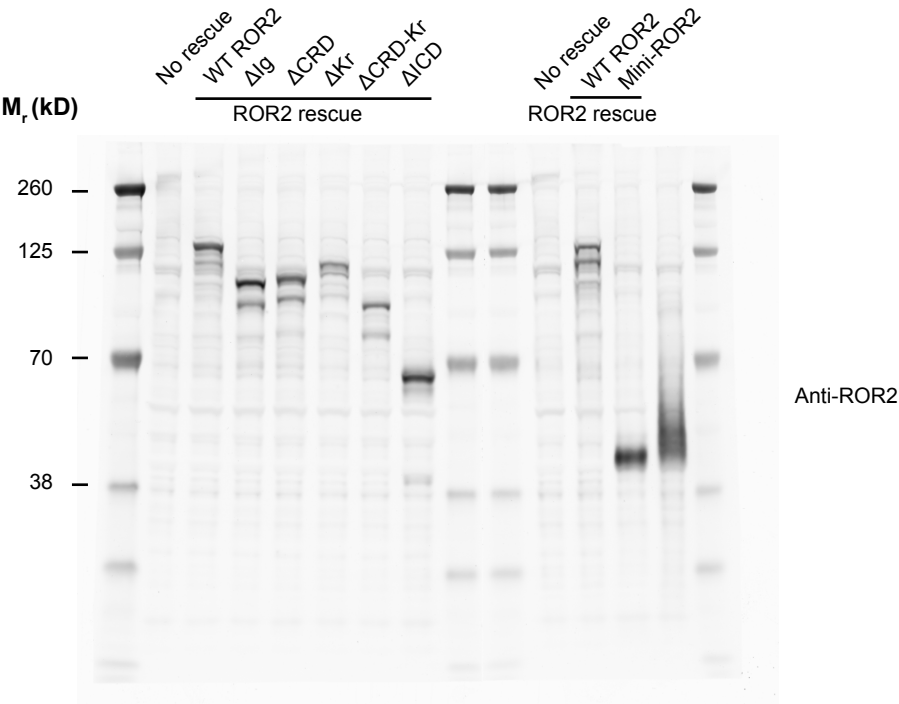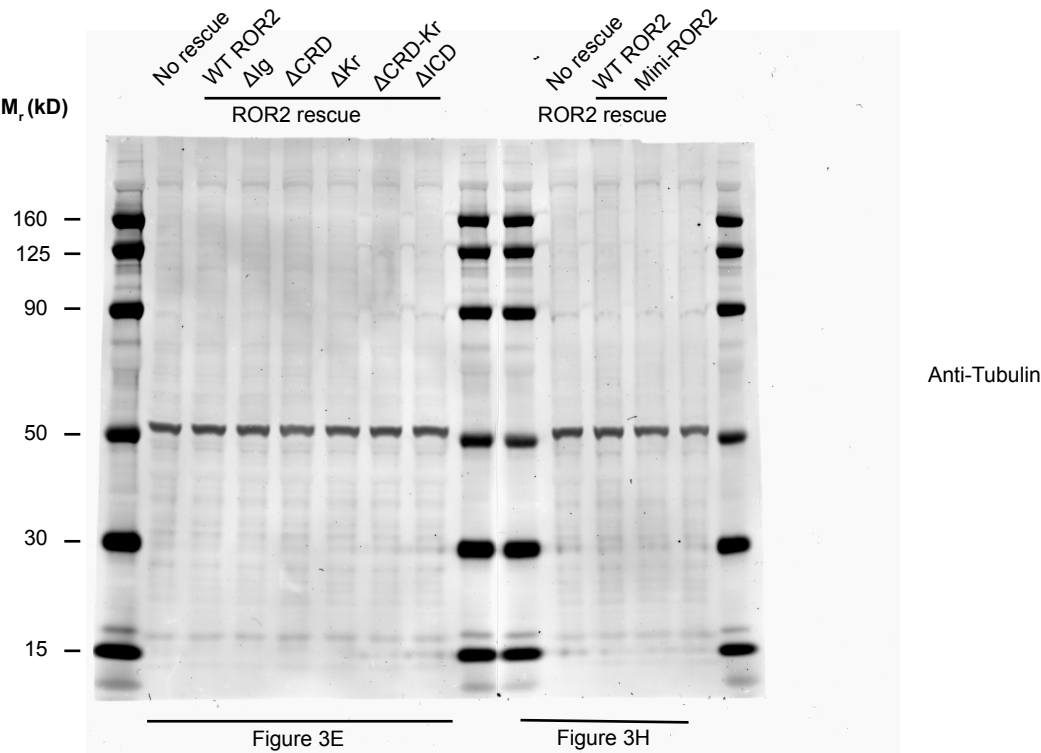

Supplement: supp [file elife-71980-supp-v1.zip]

Figure 5C  
Uncropped blots with labels

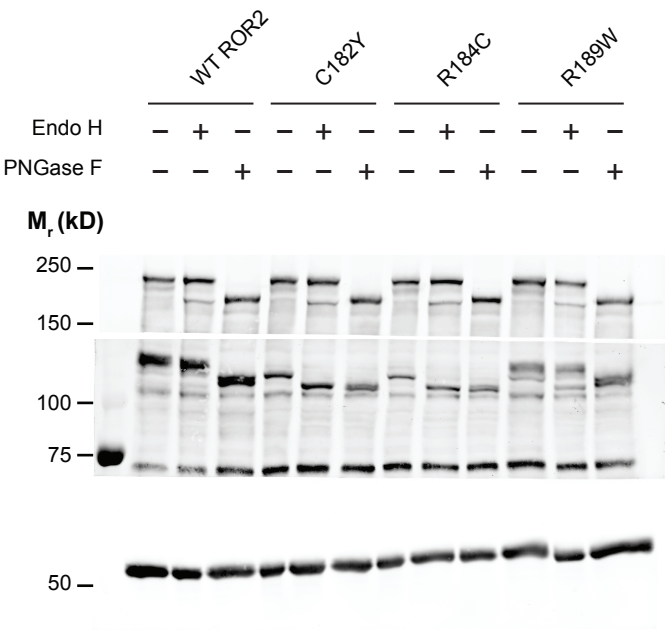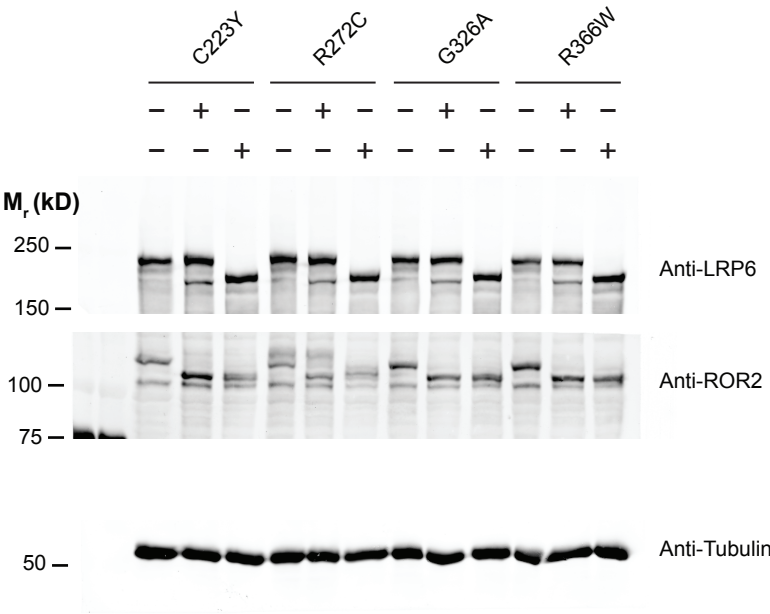

Supplement: supp [file elife-71980-supp-v1.zip]

**Figure 3E**  
**Uncropped blots with labels**

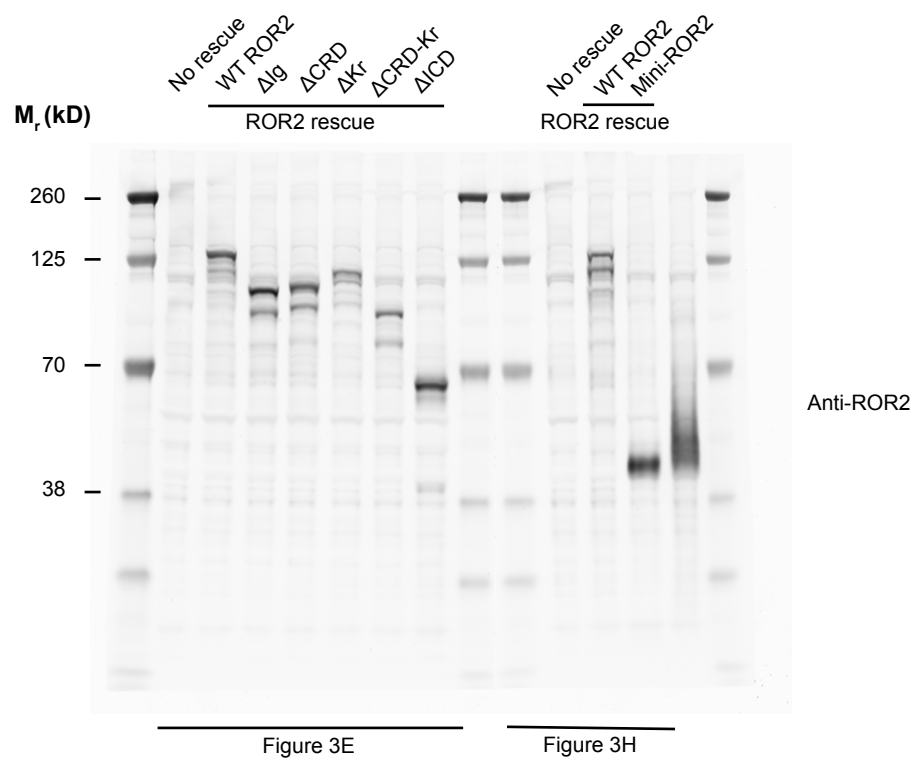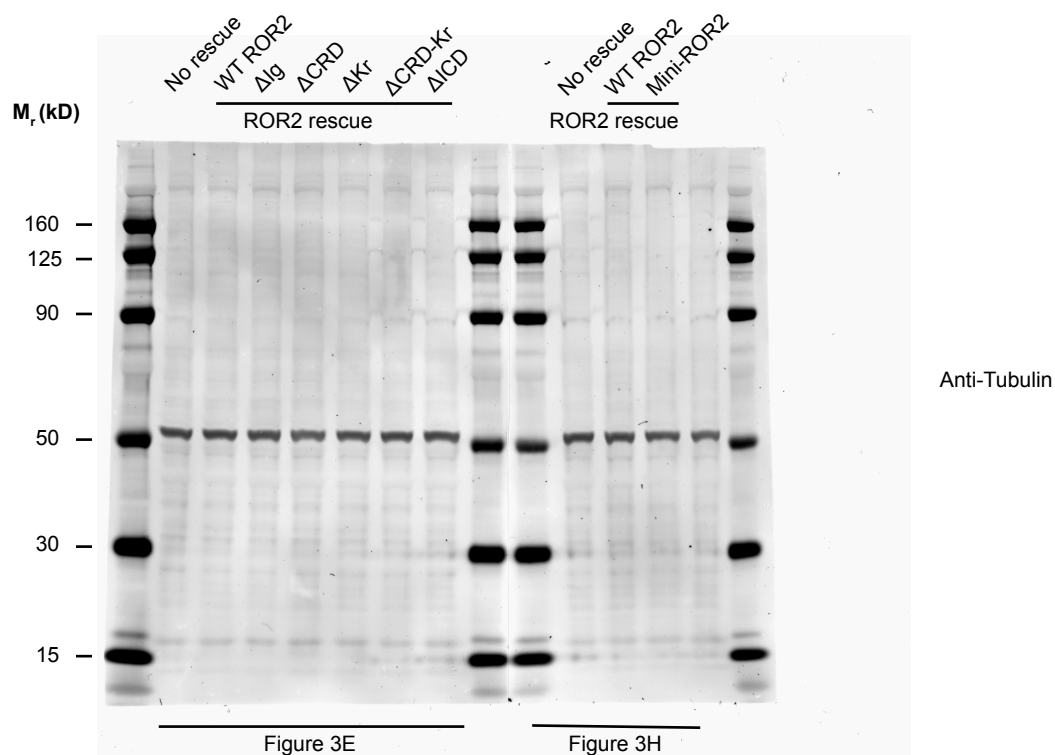

Supplement: supp [file elife-71980-supp-v1.zip]

Figure 3-figure supplement 2

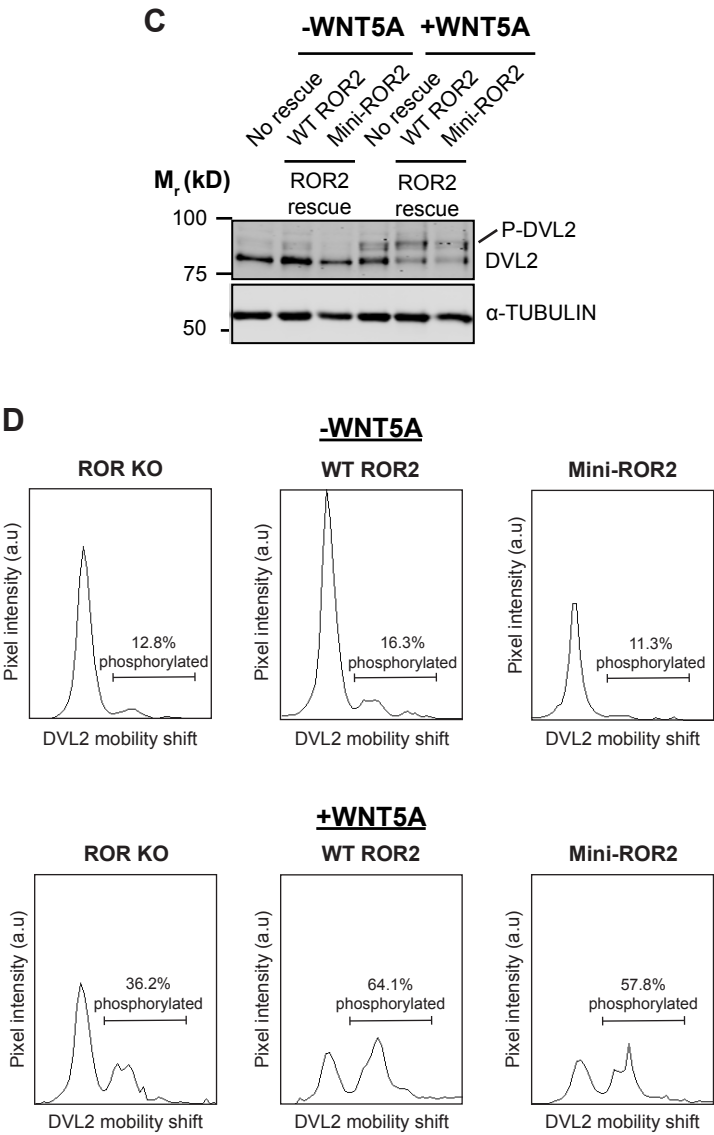

Supplement: supp [file elife-71980-supp-v1.zip]

Figure 3-figure supplement 2A  
Uncropped blots with labels

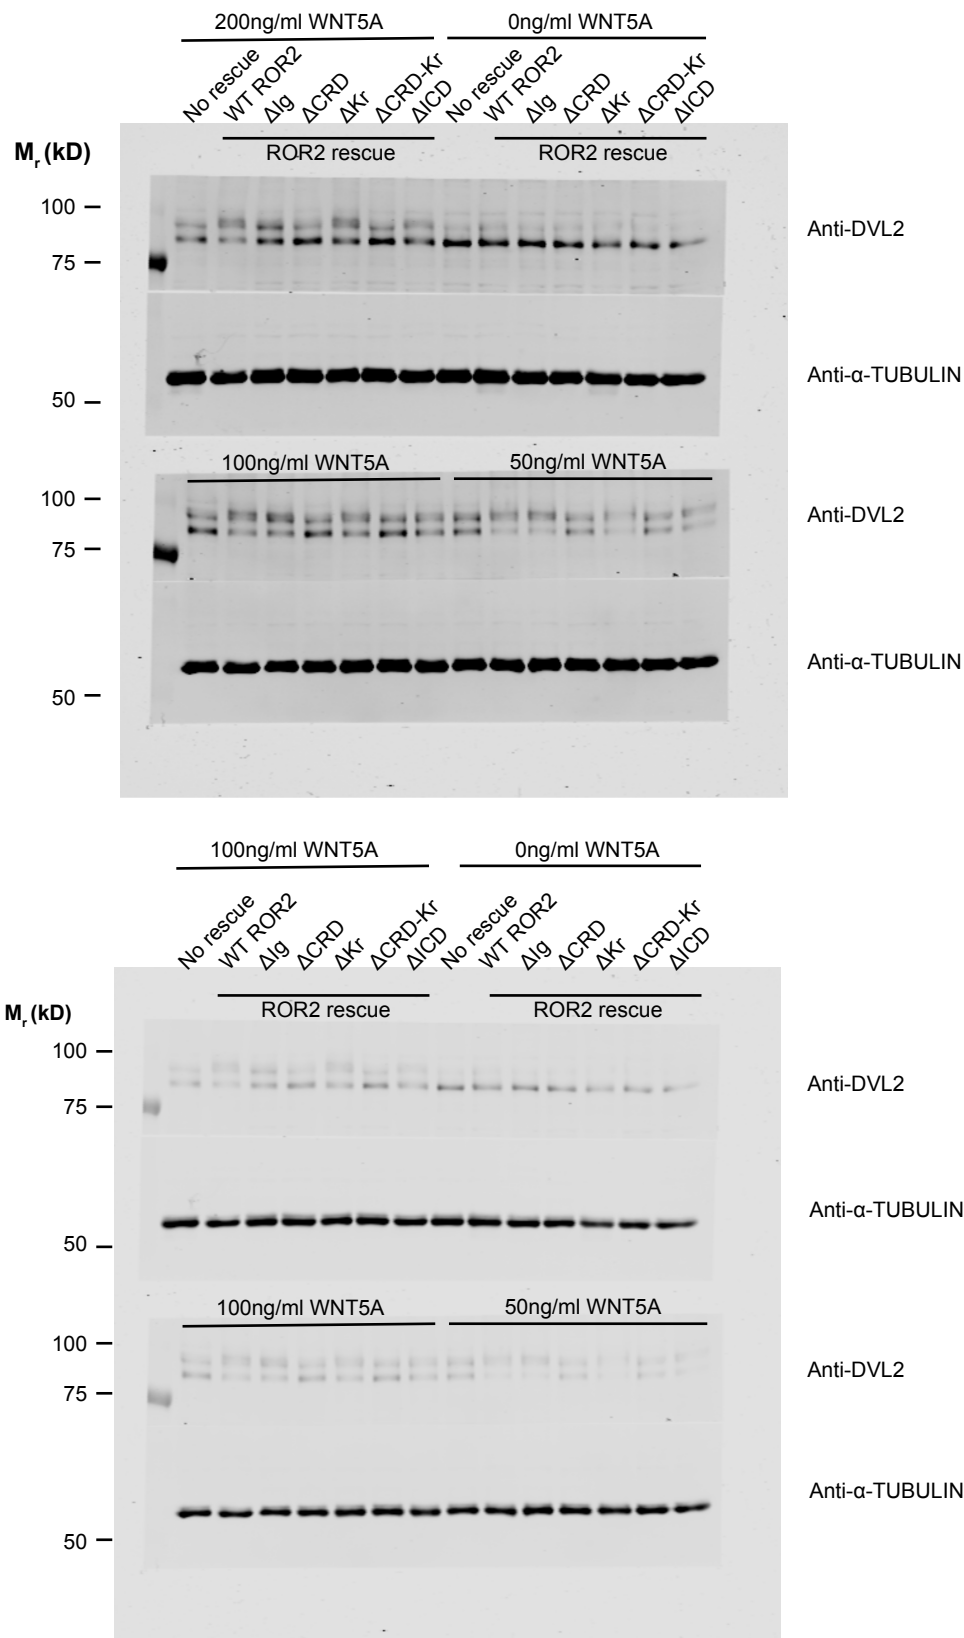

Supplement: supp [file elife-71980-supp-v1.zip]

Figure 2-figure supplement 1

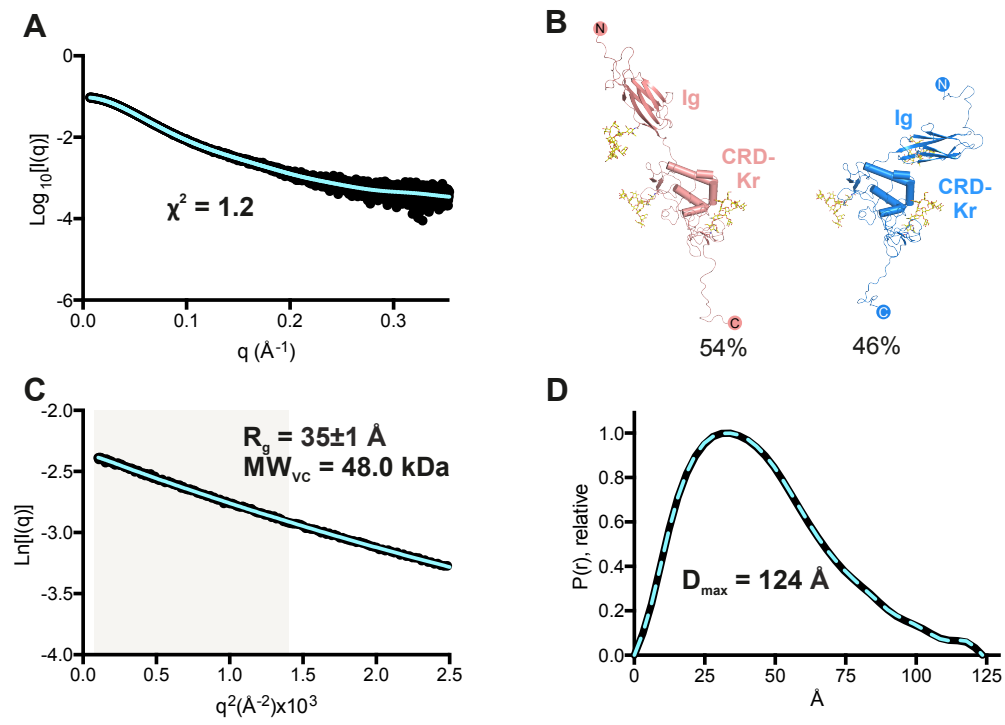

Supplement: supp [file elife-71980-supp-v1.zip]

Figure 3-figure supplement 1

A

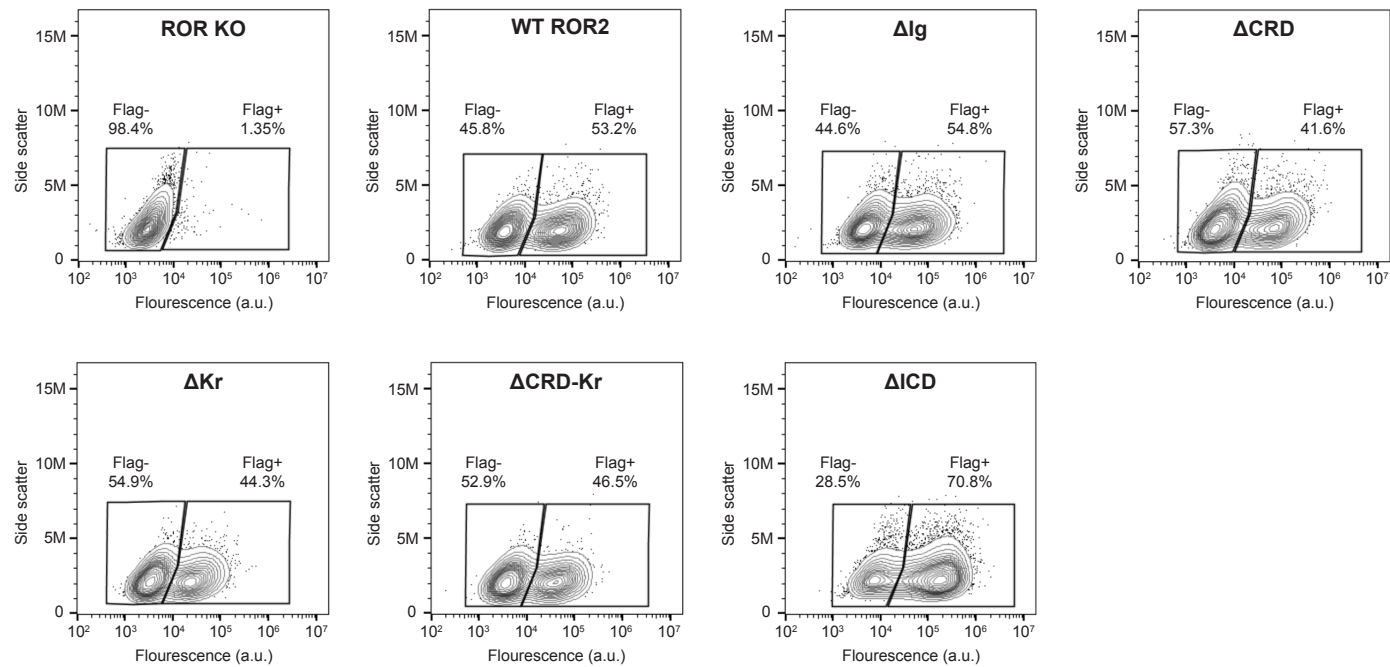

B

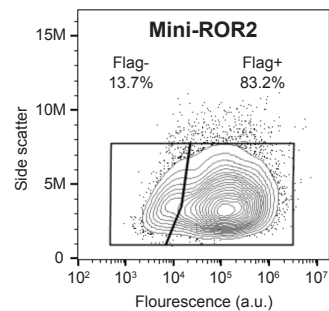

Supplement: supp [file elife-71980-supp-v1.zip]

**Figure 3B**  
**Uncropped blots with labels**

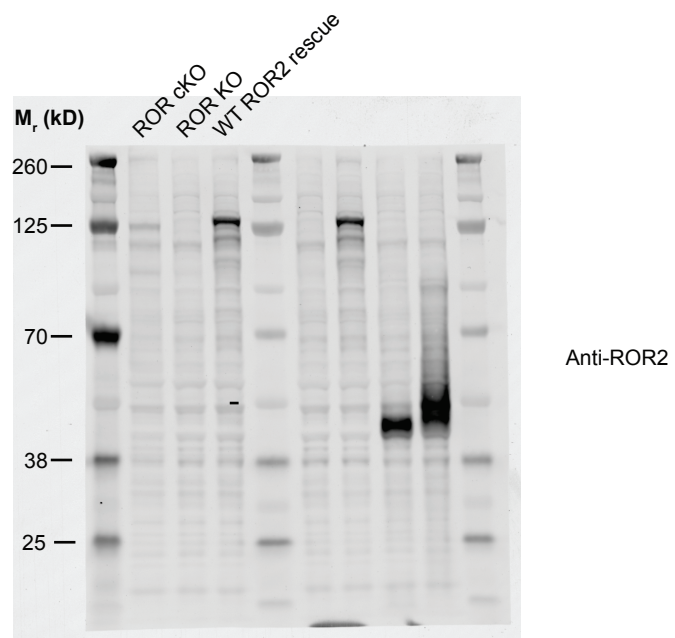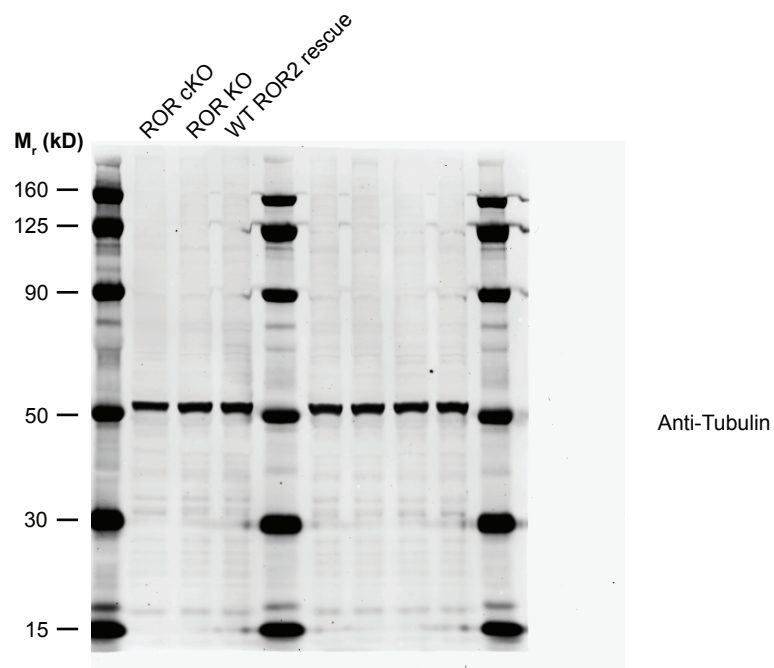

Supplement: supp [file elife-71980-supp-v1.zip]
